# Supplementary material for: Effect of PTTG on endogenous gene expression in HEK 293 cells
Source: Springer Nature journal article supplement (doi:10.1186/1471-2164-10-577), 2009-01-01
Supplement: Additional file 1 [file 1471-2164-10-577-s1.doc]

Supplement table 1. List of genes differentially regulated by PTTG in HEK 293 cells

| **Affy ID** | **Gene Title** | **p-value** | **Fold Change** |
| --- | --- | --- | --- |
| 213139_at | snail homolog 2 (Drosophila) | 1.65E-07 | -3.58522 |
| 218839_at | hairy/enhancer-of-split related with YRPW motif 1 | 1.68E-06 | -2.3686 |
| 219764_at | frizzled homolog 10 (Drosophila) | 2.51E-06 | -3.95513 |
| 203554_x_at | pituitary tumor-transforming 1 | 2.89E-06 | 4.38588 |
| 44783_s_at | hairy/enhancer-of-split related with YRPW motif 1 | 3.34E-06 | -2.09362 |
| 214557_at | pituitary tumor-transforming 2 | 3.38E-06 | 13.8665 |
| 202934_at | hexokinase 2 | 8.57E-06 | -2.15497 |
| 209291_at | inhibitor of DNA binding 4, dominant negative helix-loop-helix protein | 1.23E-05 | -2.12624 |
| 208511_at | pituitary tumor-transforming 3 | 1.75E-05 | 10.6135 |
| 201466_s_at | jun oncogene | 2.12E-05 | -3.86766 |
| 206170_at | adrenergic, beta-2-, receptor, surface | 2.96E-05 | -4.27005 |
| 214522_x_at | histone cluster 1, H3d | 3.20E-05 | 3.383 |
| 201464_x_at | jun oncogene | 3.60E-05 | -2.49345 |
| 209771_x_at | CD24 molecule | 3.76E-05 | 2.03506 |
| 201465_s_at | jun oncogene | 4.01E-05 | -2.6427 |
| 205290_s_at | bone morphogenetic protein 2 | 4.02E-05 | -2.11913 |
| 208490_x_at | histone cluster 1, H2bf | 4.97E-05 | 5.2911 |
| 209292_at | Inhibitor of DNA binding 4, dominant negative helix-loop-helix protein | 5.18E-05 | -2.43889 |
| 204798_at | v-myb myeloblastosis viral oncogene homolog (avian) | 5.41E-05 | 2.25793 |
| 221582_at | histone cluster 3, H2a | 6.13E-05 | 3.17802 |
| 221743_at | CUG triplet repeat, RNA binding protein 1 | 6.53E-05 | -2.13188 |
| 204457_s_at | growth arrest-specific 1 | 7.43E-05 | -2.88552 |
| 214290_s_at | histone cluster 2, H2aa3 /// histone cluster 2, H2aa4 | 7.57E-05 | 11.0202 |
| 218559_s_at | v-maf musculoaponeurotic fibrosarcoma oncogene homolog B (avian) | 8.07E-05 | -4.00909 |
| 218280_x_at | histone cluster 2, H2aa3 /// histone cluster 2, H2aa4 | 9.73E-05 | 10.8389 |
| 206110_at | histone cluster 1, H3h | 0.000125448 | 8.00716 |
| 222162_s_at | ADAM metallopeptidase with thrombospondin type 1 motif, 1 | 0.000132118 | -2.21934 |
| 208180_s_at | histone cluster 1, H4h | 0.00013455 | 3.35942 |
| 209398_at | histone cluster 1, H1c | 0.000137101 | 17.7826 |
| 208527_x_at | histone cluster 1, H2be | 0.000138273 | 5.50506 |
| 208523_x_at | histone cluster 1, H2bi | 0.000148127 | 4.23292 |
| 208546_x_at | histone cluster 1, H2bh | 0.000156095 | 6.52747 |
| 219433_at | BCL6 co-repressor | 0.000156257 | -2.052 |
| 207046_at | histone cluster 2, H4a /// histone cluster 2, H4b | 0.000159328 | 3.28037 |
| 202708_s_at | histone cluster 2, H2be | 0.000160063 | 14.3925 |
| 222067_x_at | histone cluster 1, H2bd | 0.000160924 | 5.78925 |
| 202431_s_at | v-myc myelocytomatosis viral oncogene homolog (avian) | 0.000165935 | -3.45379 |
| 209911_x_at | histone cluster 1, H2bd | 0.000167692 | 10.7173 |
| 209301_at | carbonic anhydrase II | 0.000178408 | -2.15139 |
| 204567_s_at | ATP-binding cassette, sub-family G (WHITE), member 1 | 0.000179538 | 4.07493 |
| 213931_at | inhibitor of DNA binding 2, dominant negative helix-loop-helix protein /// inhib | 0.000180747 | -2.34504 |
| 202386_s_at | KIAA0430 | 0.000180945 | -2.2597 |
| 207156_at | histone cluster 1, H2ag | 0.000187179 | 10.7126 |
| 214455_at | histone cluster 1, H2bg /// histone cluster 1, H2bc | 0.000208423 | 6.54565 |
| 208579_x_at | H2B histone family, member S | 0.000209317 | 6.28002 |
| 209198_s_at | synaptotagmin XI | 0.000239937 | 2.60274 |
| 212313_at | CHMP family, member 7 | 0.000251022 | -2.21848 |
| 206552_s_at | tachykinin, precursor 1 (substance K, substance P, neurokinin 1, neurokinin 2, n | 0.000286946 | 2.30123 |
| 205289_at | bone morphogenetic protein 2 | 0.000303167 | -2.26192 |
| 200632_s_at | N-myc downstream regulated gene 1 | 0.000375801 | -2.14958 |
| 220138_at | heart and neural crest derivatives expressed 1 | 0.000377835 | -2.08077 |
| 214472_at | histone cluster 1, H3d | 0.000463089 | 4.93375 |
| 214540_at | histone cluster 1, H2bo | 0.000469653 | 3.10086 |
| 214481_at | Histone cluster 1, H2am | 0.00050498 | 2.88766 |
| 215071_s_at | histone cluster 1, H2ac | 0.000510272 | 20.1498 |
| 204206_at | MAX binding protein | 0.000547646 | 2.26825 |
| 209521_s_at | angiomotin | 0.000594845 | -2.88628 |
| 209806_at | histone cluster 1, H2bk | 0.000622015 | 4.86385 |
| 200799_at | heat shock 70kDa protein 1A | 0.000644396 | -3.59249 |
| 213116_at | NIMA (never in mitosis gene a)-related kinase 3 | 0.000647863 | -2.58215 |
| 222227_at | --- | 0.00103278 | 4.07794 |
| 209293_x_at | inhibitor of DNA binding 4, dominant negative helix-loop-helix protein | 0.00157294 | -2.08579 |
| 204866_at | PHD finger protein 16 | 0.00160591 | -2.65422 |
| 214502_at | histone cluster 1, H2bj | 0.00170781 | 3.04323 |
| 211089_s_at | NIMA (never in mitosis gene a)-related kinase 3 | 0.00204223 | -2.28397 |
| 203394_s_at | hairy and enhancer of split 1, (Drosophila) | 0.00221195 | -2.01143 |
| 207144_s_at | Cbp/p300-interacting transactivator, with Glu/Asp-rich carboxy-terminal domain, | 0.00232762 | -2.3447 |
| 201997_s_at | spen homolog, transcriptional regulator (Drosophila) | 0.00240513 | -2.32776 |
| 215128_at | CDNA FLJ11682 fis, clone HEMBA1004880 | 0.00294914 | -2.25117 |
| 214948_s_at | TATA element modulatory factor 1 | 0.00326285 | -2.81839 |
| 207781_s_at | zinc finger protein 711 | 0.00389047 | -2.04415 |
| 213281_at | Jun oncogene | 0.00482477 | -2.00864 |
| 204913_s_at | SRY (sex determining region Y)-box 11 | 0.00505387 | -2.48154 |
| 214949_at | CDNA FLJ31919 fis, clone NT2RP7004964 | 0.0053862 | -2.94789 |
| 216060_s_at | dishevelled associated activator of morphogenesis 1 | 0.00593811 | -2.13674 |
| 216361_s_at | MYST histone acetyltransferase (monocytic leukemia) 3 | 0.0059859 | -2.11249 |
| 204859_s_at | apoptotic peptidase activating factor 1 | 0.00612863 | -2.07116 |
| 213123_at | microfibrillar-associated protein 3 | 0.00710101 | -2.17071 |
| 211974_x_at | recombination signal binding protein for immunoglobulin kappa J region | 0.00771879 | -2.60633 |
| 219779_at | zinc finger homeobox 4 | 0.00811452 | -2.2118 |
| 219297_at | WD repeat domain 44 | 0.00950148 | -2.59478 |
| 203543_s_at | kruppel-like factor 9 | 0.0095213 | -2.85423 |
| 204914_s_at | SRY (sex determining region Y)-box 11 | 0.0100522 | -2.80436 |
| 218279_s_at | histone cluster 2, H2aa3 | 0.0102562 | 2.2075 |
| 201996_s_at | spen homolog, transcriptional regulator (Drosophila) | 0.0107577 | -2.18771 |
| 221245_s_at | frizzled homolog 5 (Drosophila) | 0.0119806 | -2.20456 |
| 212476_at | centaurin, beta 2 | 0.012313 | -2.07683 |
| 201461_s_at | mitogen-activated protein kinase-activated protein kinase 2 | 0.0131799 | -2.01275 |
| 212888_at | dicer1, Dcr-1 homolog (Drosophila) | 0.0158937 | -2.62201 |
| 207785_s_at | recombination signal binding protein for immunoglobulin kappa J region | 0.0162663 | -2.58305 |
| 206061_s_at | dicer1, Dcr-1 homolog (Drosophila) | 0.0176947 | -2.85858 |
| 200800_s_at | heat shock 70kDa protein 1A /// heat shock 70kDa protein 1B | 0.0176996 | -2.0471 |
| 203689_s_at | fragile X mental retardation 1 | 0.0209561 | -2.19451 |
| 209733_at | hypothetical protein LOC286440 | 0.0247722 | -2.27926 |
| 213229_at | dicer1, Dcr-1 homolog (Drosophila) | 0.0264143 | -2.53069 |
| 200816_s_at | platelet-activating factor acetylhydrolase, isoform Ib, alpha subunit 45kDa | 0.0267333 | -2.02579 |
| 215245_x_at | fragile X mental retardation 1 | 0.0324739 | -2.13946 |
| 213313_at | RAB GTPase activating protein 1 | 0.0332312 | -2.05143 |
| 219312_s_at | zinc finger and BTB domain containing 10 | 0.0359223 | -2.60828 |
| 209307_at | SWAP-70 protein | 0.0369236 | -2.21634 |
| 205051_s_at | v-kit Hardy-Zuckerman 4 feline sarcoma viral oncogene homolog | 0.038958 | -2.07989 |
| 201855_s_at | ATM/ATR-Substrate Chk2-Interacting Zn2+-finger protein | 0.049146 | -2.03411 |
| 212150_at | KIAA0143 protein | 0.0535425 | -2.18383 |
| 219631_at | low density lipoprotein-related protein 12 | 0.0604262 | -2.04904 |
| 213552_at | glucuronic acid epimerase | 0.0702648 | -2.04806 |
| 212149_at | KIAA0143 protein | 0.0768093 | -2.13148 |
